# Supplementary material for: Macrocycle as a “Container” for Dinitramide Salts
Source: MDPI journal article supplement (doi:10.3390/ma15196958), 2022-10-07
Supplement: s1 [file s1]

## *Supplementary Materials*

### **Macrocycle as a “Container” for Dinitramide Salts**

Sergey G. Il'yasov,\* Vera S. Glukhacheva, Dmitri S. Il'yasov, and Egor E. Zhukov

*Laboratory for High-Energy Compounds Synthesis, Institute for Problems of Chemical and Energetic Technologies, Siberian Branch of the Russian Academy of Sciences (IPCET SB RAS), Biysk 659322, Altai Krai, Russia*

*\*Corresponding author. E-mail: ilysov@ipcet.ru (S. Il'yasov)*

#### **Table of Contents**

|                                                                                                |       |
|------------------------------------------------------------------------------------------------|-------|
| IR spectra of <b>7</b> and <b>8</b>                                                            | S2    |
| DSC and TGA of <b>7</b> and <b>8</b>                                                           | S3–S5 |
| Testing of compound <b>8</b> for burning rate of KNO <sub>3</sub> /Zr pyrotechnic composition  | S6–S7 |
| Testing of compound <b>8</b> for burning rate of KClO <sub>4</sub> /Al pyrotechnic composition | S8–S9 |

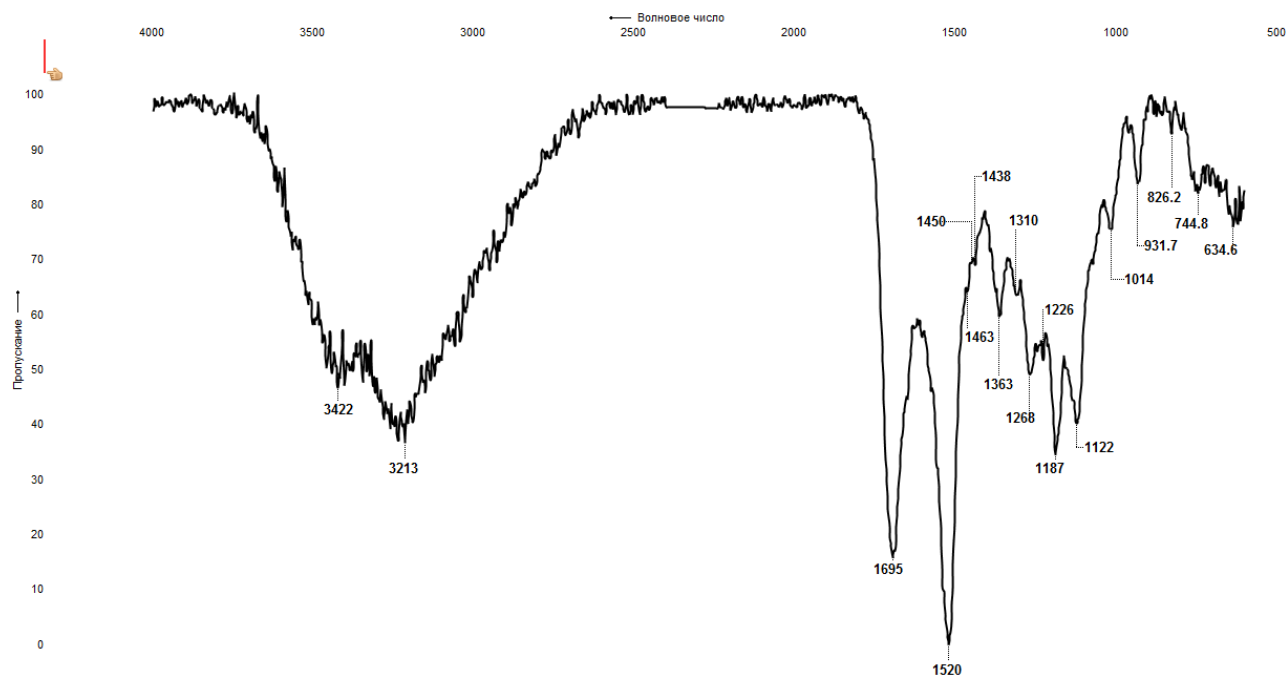

**Figure S1.** IR spectrum of **7**

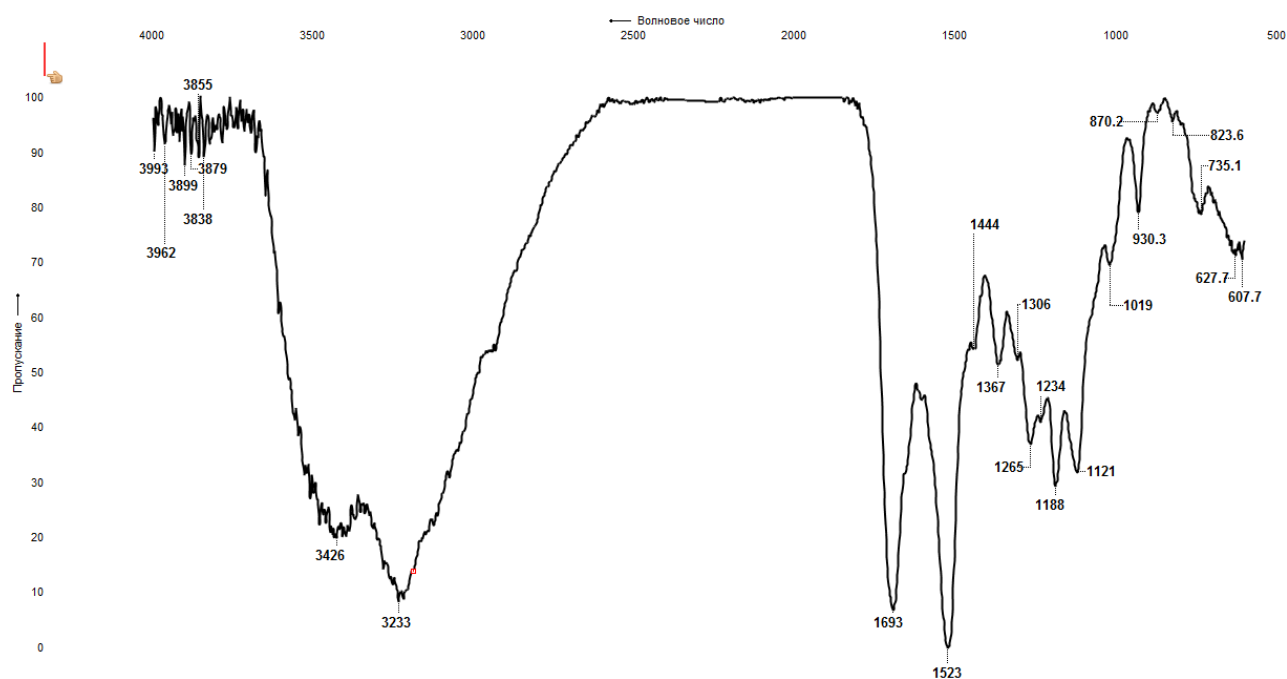

**Figure S2.** IR spectrum of **8**

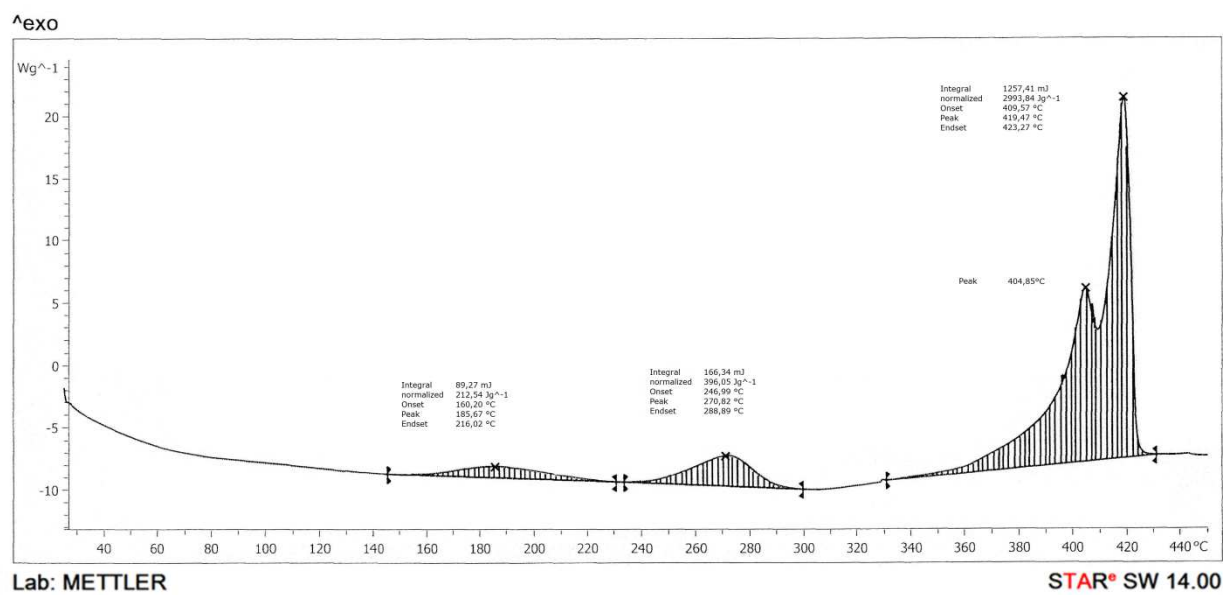

**Figure S3. DSC of 7**

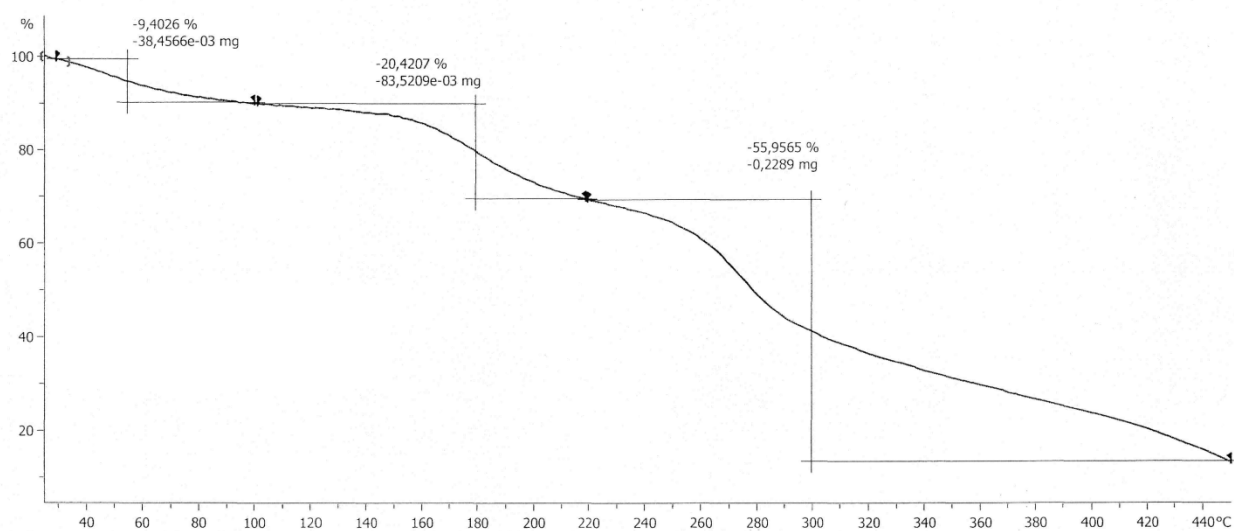

**Figure S4. TGA of 7**

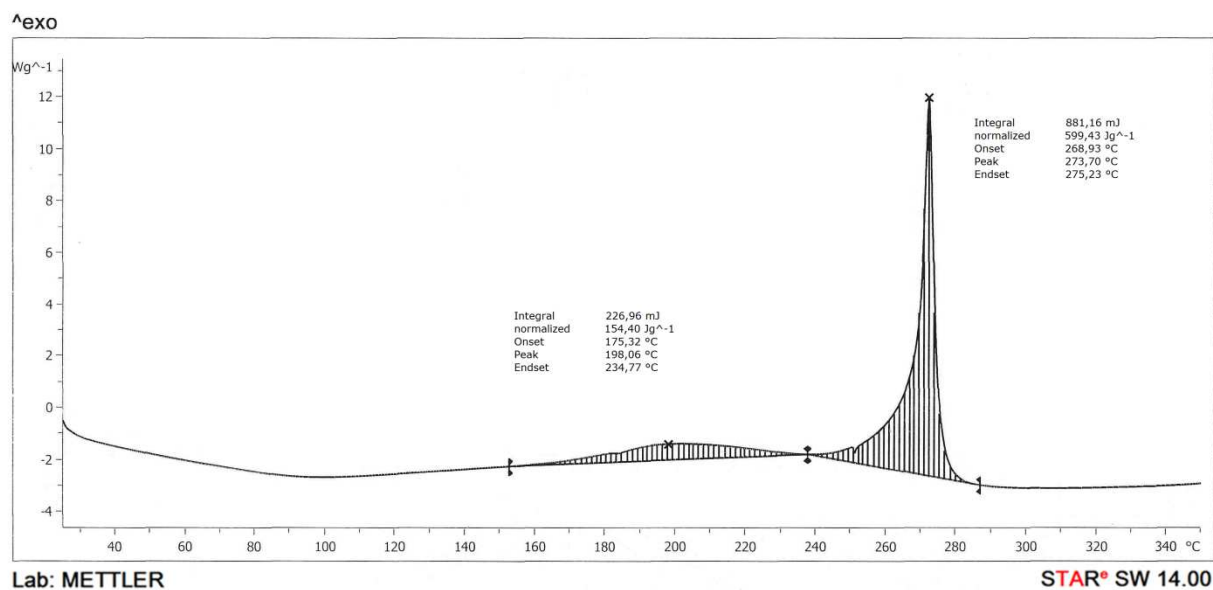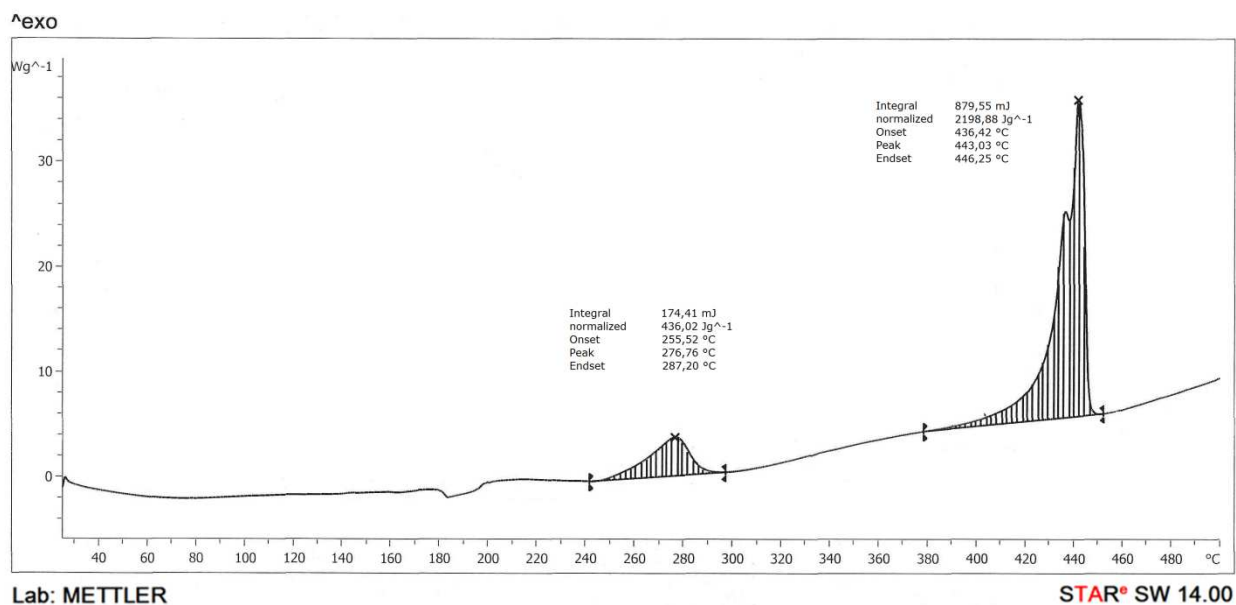

**Figure S5. DSC of 8**

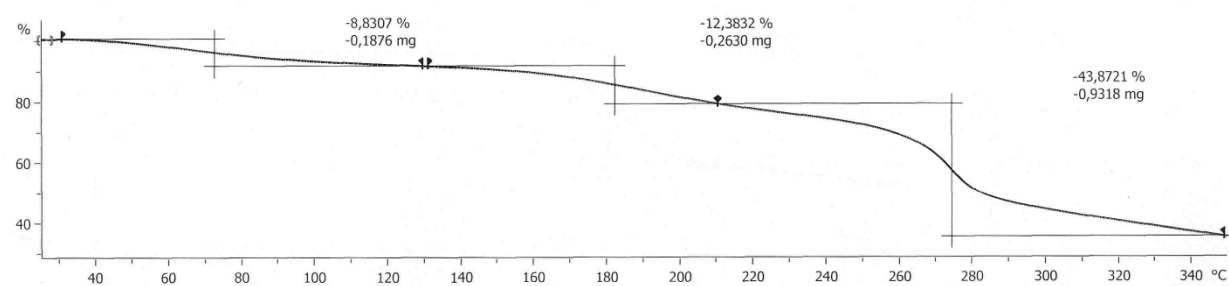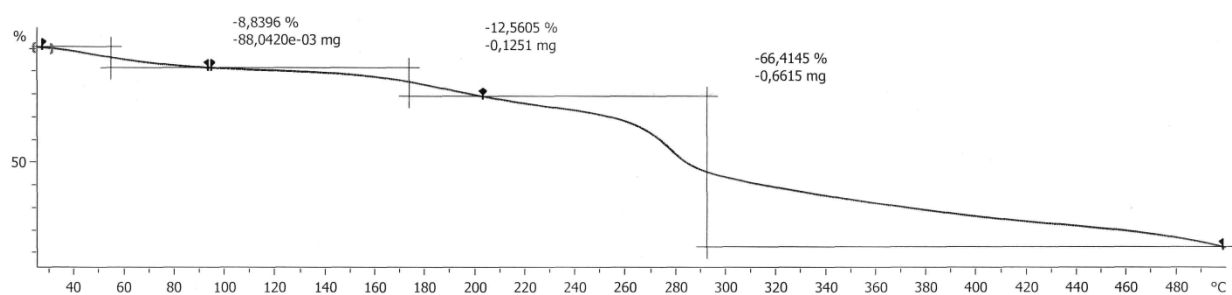

**Figure S6. TGA of 8**

**Testing compound 8 for burning rate of  
KNO<sub>3</sub>/Zr pyrotechnic composition**

The following formulation was employed as the model composition: 52% zirconium (PCZr-1 grade (powdered calciothermic Zr), technical specifications No. 48-4-234-84, particle size 1–15 µm) and 48% potassium nitrate (chemically pure grade, GOST R 4217-77, particle size 63–160 µm).

Compound **8** was used as the burning-rate modifier composed of (MZ)<sub>5</sub> Ni[N(NO<sub>2</sub>)<sub>2</sub>]<sub>2</sub> 10H<sub>2</sub>O with added 3.71% Ni.

**Table S1.** Burning rate of model composition (no additives)

| Sample #, sensor # | <i>l</i> , mm | time, s   | <i>u</i> , mm/s | mean <i>u</i> , mm/s |
|--------------------|---------------|-----------|-----------------|----------------------|
| 1.1-2              | 4.28          | 0.11864   | 36,07552        | 33.9783              |
| 1.2-3              | 4.40          | 0.11967   | 36,76778        |                      |
| 1.3-4              | 4.34          | 0.12108   | 35,84407        |                      |
| 2.1-2              | 4.40          | 0.12851   | 34,23858        |                      |
| 2.2-3              | 4.22          | 0.12901   | 32,71140        |                      |
| 2.3-4              | 4.18          | 0.13071   | 31,97944        |                      |
| 3.1-2              | 4.40          | 0.12910   | 34,08211        |                      |
| 3.2-3              | 4.22          | 0.14007   | 30,12779        |                      |
| 3.3-4              | 4.24          | * failure | -               |                      |

Charge density: 2.82–2.95 g/cm<sup>3</sup>.

\* failure – simultaneous short circuit of sensors no.3 and no.4.

**Table S2.** Burning rate with 0.5% **8**

| Sample #, sensor # | <i>l</i> , mm | time, s | <i>u</i> , mm/s | mean <i>u</i> , mm/s |
|--------------------|---------------|---------|-----------------|----------------------|
| 1.1-2              | 4.3           | 0.18004 | 23.88358        | 22.6255              |
| 1.2-3              | 4.2           | 0.18543 | 22.65006        |                      |
| 1.3-4              | 4.38          | 0.22208 | 19.72262        |                      |
| 2.1-2              | 4.32          | 0.17777 | 24.30065        |                      |
| 2.2-3              | 4.36          | 0.19379 | 22.49858        |                      |
| 2.3-4              | 4.22          | 0.20021 | 21.07787        |                      |
| 3.1-2              | 4.36          | 0.19331 | 22.55445        |                      |
| 3.2-3              | 4.32          | 0.17367 | 24.87476        |                      |
| 3.3-4              | 4.22          | 0.19124 | 22.06651        |                      |

Charge density: 2.76–2.84 g/cm<sup>3</sup>.

**Table S3.** Burning rate with 1.0% **8**

| Sample #, sensor # | <i>l</i> , mm | time, s | <i>u</i> , mm/s | mean <i>u</i> , mm/s |
|--------------------|---------------|---------|-----------------|----------------------|
| 1.1-2              | 4.3           | 0.19871 | 21.63958        | 21.4868              |
| 1.2-3              | 4.3           | 0.20220 | 21.26607        |                      |
| 1.3-4              | 4.3           | 0.19406 | 22.15810        |                      |
| 2.1-2              | 4.32          | 0.21564 | 20.03339        |                      |
| 2.2-3              | 4.24          | 0.17506 | 24.22027        |                      |
| 2.3-4              | 4.28          | 0.22028 | 19.42982        |                      |

|       |      |         |          |
|-------|------|---------|----------|
| 3.1-2 | 4,22 | 0.19612 | 21.51744 |
| 3.2-3 | 4,22 | 0.20582 | 20.50335 |
| 3.3-4 | 4,24 | 0,18750 | 22,61333 |

Charge density: 2.81–2.91 g/cm<sup>3</sup>.

**Table S4. Burning rate with 1.5% 8**

| Sample #, sensor # | <i>l</i> , mm | time, s  | <i>u</i> , mm/s | mean <i>u</i> , mm/s |
|--------------------|---------------|----------|-----------------|----------------------|
| 1.1-2              | 4.22          | 0.20375  | 20.71166        | 20.0348              |
| 1.2-3              | 4.3           | 0.18301  | 23.49598        |                      |
| 1.3-4              | 4.34          | 0.18423  | 23.55751        |                      |
| 2.1-2              | 4.54          | 0.23788  | 19.08525        |                      |
| 2.2-3              | 4.26          | 0.25301  | 16.83728        |                      |
| 2.3-4              | 4.18          | 0.22551  | 16.52109        |                      |
| 3.1-2              | 4.34          | *failure |                 |                      |
| 3.2-3              | 4.64          | *failure |                 |                      |
| 3.3-4              | 4.4           | *failure |                 |                      |

Charge density: 2.81–2.87 g/cm<sup>3</sup>.

\* failure – simultaneous triggering of sensors nos.1, 2 and 4.

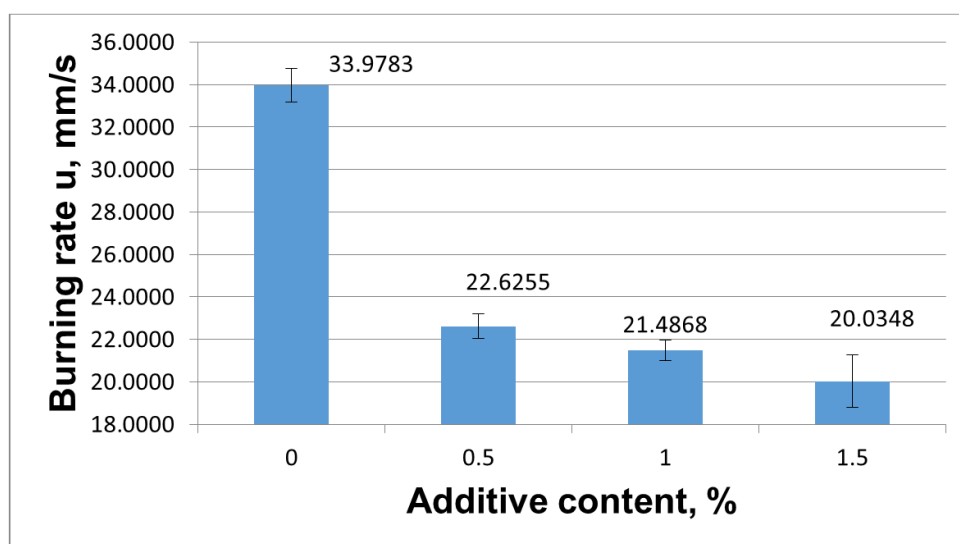

**Figure S7.** Effect of modifier 8 on the variation in the burning rate of KNO<sub>3</sub>/Zr

**Testing compound 8 for burning rate of  
KClO<sub>4</sub>/Al pyrotechnic composition**

The following formulation was employed as the model composition: 70% potassium perchlorate (chemically pure grade, technical specifications No. 6-09-3801-76, particle size 63–160 μm) and 30% aluminum (ASD-4 grade, technical specifications No. 48-5-226-87, particle size 4–10 μm).

Compound **8** was used as the burning-rate modifier composed of (MZ)<sub>5</sub> Ni[N(NO<sub>2</sub>)<sub>2</sub>]<sub>2</sub> 10H<sub>2</sub>O with added 3.71% Ni.

**Table S5.** Burning rate of model composition (no additives)

| Sample #, sensor # | <i>l</i> , mm | time, s  | <i>u</i> , mm/s | mean <i>u</i> , mm/s |
|--------------------|---------------|----------|-----------------|----------------------|
| 1.1-2              | 5.22          | 1.31879  | 3.958174        | 3.857847             |
| 1.2-3              | 5.3           | 1.12713  | 4.702208        |                      |
| 1.3-4              | 5.32          | *failure |                 |                      |
| 2.1-2              | 5.36          | 1.42547  | 3.760163        |                      |
| 2.2-3              | 5.4           | 1.75731  | 3.072878        |                      |
| 2.3-4              | 5.34          | 1.45117  | 3.679789        |                      |
| 3.1-2              | 5.34          | 1.42106  | 3.757758        |                      |
| 3.2-3              | 5.28          | 1.49087  | 3.541556        |                      |
| 3.3-4              | 5.44          | 1.23911  | 4.390248        |                      |

Charge density: 2.27–2.35 g/cm<sup>3</sup>.

\* failure – no short circuit of sensor no.4.

**Table S6.** Burning rate with 0.5% **8**

| Sample #, sensor # | <i>l</i> , mm | time, s  | <i>u</i> , mm/s | mean <i>u</i> , mm/s |
|--------------------|---------------|----------|-----------------|----------------------|
| 1.1-2              | 5.34          | 1.5716   | 3.3978          | 2.9385               |
| 1.2-3              | 5.4           | 1.6919   | 3.1917          |                      |
| 1.3-4              | 5.52          | 0.7069   | 7.8093          |                      |
| 2.1-2              | 10.88         | 4.2119   |                 |                      |
| 2.2-3              | 5.36          | *failure |                 |                      |
| 2.3-4              | 5.3           | 0.5734   | 9.2439          |                      |
| 3.1-2              | 5.42          | 1.8986   | 2.8547          |                      |
| 3.2-3              | 5.38          | 1.8833   | 2.8567          |                      |
| 3.3-4              | 5.3           | 1.9293   | 2.7471          |                      |

Charge density: 2.28–2.33 g/cm<sup>3</sup>.

\*\* failure – simultaneous short circuit of sensors nos. 2 and 3

**Table S7.** Burning rate with 1.0% **8**

| Sample #, sensor # | <i>l</i> , mm | time, s | <i>u</i> , mm/s | mean <i>u</i> , mm/s |
|--------------------|---------------|---------|-----------------|----------------------|
| 1.1-2              | 5.38          | 4.1184  | 1.3063          | 2.3835               |
| 1.2-3              | 5.42          | 2.4752  | 2.1897          |                      |
| 1.3-4              | 5.40          | 1.7472  | 3.0907          |                      |

|       |      |        |        |
|-------|------|--------|--------|
| 2.1-2 | 5.36 | 5.3675 | 0.9986 |
| 2.2-3 | 5.38 | 1.9157 | 2.8084 |
| 2.3-4 | 5.42 | 1.3289 | 4.0786 |
| 3.1-2 | 5.40 | 3.6334 | 1.4862 |
| 3.2-3 | 5.50 | 2.3696 | 2.3211 |
| 3.3-4 | 5.40 | 1.7026 | 3.1716 |

Charge density: 2.25–2.3 g/cm<sup>3</sup>.

**Table S8.** Burning rate with 1.5% **8**

| Sample #, sensor # | <i>l</i> , mm | time, s | <i>u</i> , mm/s | mean <i>u</i> , mm/s |
|--------------------|---------------|---------|-----------------|----------------------|
| 1.1-2              | 5.26          | 1.6196  | 3.2477          | 2.6643               |
| 1.2-3              | 5.42          | 2.2380  | 2.4218          |                      |
| 1.3-4              | 5.22          | 0.6380  | 8.1814          |                      |
| 2.1-2              | 5.5           | 1.8686  | 2.9434          |                      |
| 2.2-3              | 5.28          | 2.8244  | 1.8694          |                      |
| 2.3-4              | 5.34          | 1.4407  | 3.7065          |                      |
| 3.1-2              | 5.34          | 4.1069  | 1.3003          |                      |
| 3.2-3              | 5.28          | 2.8503  | 1.8524          |                      |
| 3.3-4              | 5.54          | 1.3945  | 3.9728          |                      |

Charge density: 2.28–2.32 g/cm<sup>3</sup>.

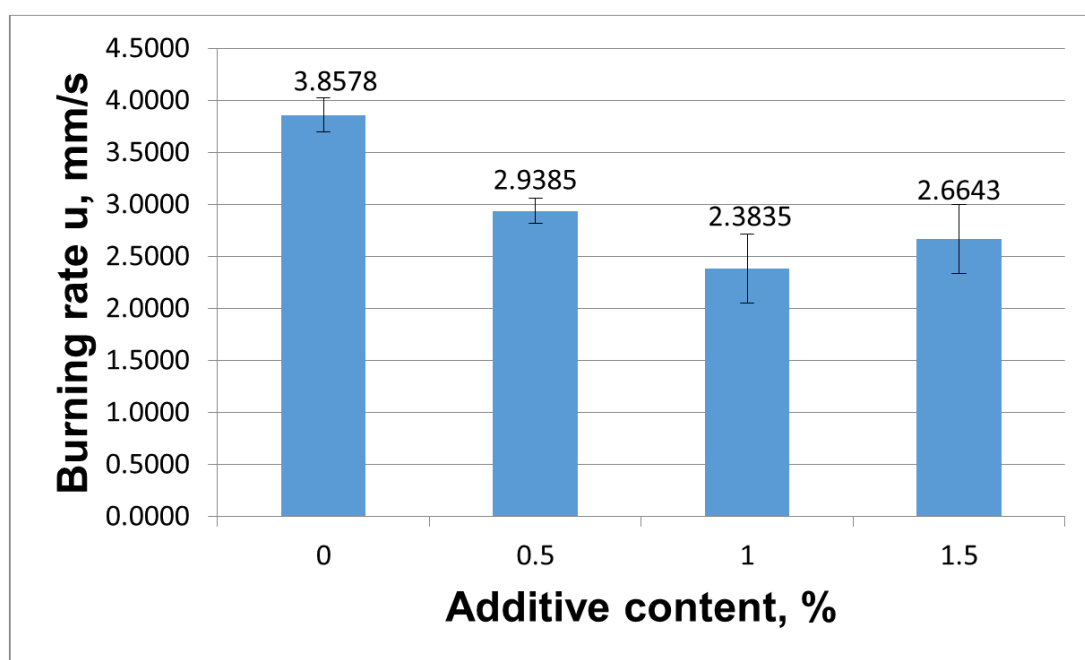

**Figure S8.** Effect of **8** on the burning rate of the KClO<sub>4</sub>/Al pyrotechnic composition
